# Supplementary material for: What drives agroecological transitions in Africa? A systematic review
Source: Research Square preprint supplement (doi:10.21203/rs.3.rs-6886777/v1), 2025-08-04
Supplement: Supplementary file 1 [file 37fc8c1b6a41f4f35a724db7.xlsx]

## Sheet: Sheet1
Authors	Title	Year	DOI	Author Keywords	Document Type	Country (where data was picked)	Methods Summary	Key Findings	Theme	Recommendations	Read by			@
Aboubakar Iyabano, Cees Leeuwis, Rico Lie, Aurélie Toillier & Ann Waters-Bayer	Making decisions about agroecological innovations: perspectives from members of farmers’ organizations in Burkina Faso	2023	10.1080/14735903.2023.2239056	Sahel; systems perspective; innovation brokers; sustainable agriculture; soil restoration	Journal Article	Burkina Faso	Semi-structured interviews with 44 farmers, document research, qualitative content analysis, descriptive statistics	Farmer organizations (FOs) play a central role in influencing farmers' decisions to implement agroecological innovations. The research highlights that the influence of FOs is primarily observed through three main drivers of decision-making: expectancy, instrumentality, and valence. The study analyzed 12 selected cases of farmers, which represented both high and low implementation of agroecologica…	Farmer Organizations influence on farmer decisions	The major recommendations from this study include increasing funding support to farmer organizations (FOs) to enhance their capacity in providing agroecological innovations development activities. This support could help stimulate more farmers' implementation of agroecological innovations. Additionally, it is suggested that policies should reflect the dynamic nature of farmers' decision-making pr…	Charles
Alexandros Tataridas & Helena Freitas	The path forward: integrating agroecology into global policy frameworks	2024	10.1080/21683565.2024.2343045	Agroecology; policies; agroecological transition; agri-food system; food security	Journal Article	Global but mentions Africa	Literature review, Policy analysis. A qualitative approach, engaging in a critical analysis of existing literature and policy frameworks related to agroecology	Mainstreaming agroecology into global policies is essential for addressing food security and climate action challenges. There are significant obstacles to integrating agroecology into global policy frameworks, including a lack of awareness and capacity among policymakers regarding agroecological practices. The authors emphasize the importance of multi-stakeholder panels and policy focus groups fr…	Integrating agroecology into policy	Integrate agroecology into global policy frameworks, promote transnational partnerships, and support smallholder farmers. Development of National Agroecology Plans to achieve Sustainable Development Goals (SDGs) while ensuring long-term sustainability of agri-food systems, social well-being, and ecosystem restoration. Implementation of evidence-based agroecology policies at a global scale, includ…	Charles	completd by sylvia
Tilahun Amede, Aggie Asiimwe Konde, Jean Jacques Muhinda, George Bigirwa	Sustainable Farming in Practice: Building Resilient and Profitable Smallholder Agricultural Systems in Sub-Saharan Africa	2023	10.3390/su15075731	sustainable farming, regeneration, agroecology, livelihoods, environment, climate, smallholder	Journal Article	Ethiopia, Rwanda	Case studies, literature review, participatory workshops	The study involved expert consultations to rank the relevance of different agricultural approaches, including agroecology, in relation to the identified outcomes for smallholder farmers. The study shows that Agroecology is a dynamic concept that has gained prominence in scientific discourse but lacks specific context for smallholder farmers in the global south, particularly in sub-Saharan Africa …	Dissenting voices against agroecology - the need to contextualize the concept for small holders	The study recommends the integration of agroecological principles that prioritize soil health, nutrient recycling, and sustainable land management practices. Secondly, the study advocates for participatory and integrated approaches that connect farmers with their communities, markets, and landscapes, fostering collaboration and knowledge sharing. It highlights the need for flexibility in achievin…	Charles	completd by sylvia	3
Rachel Bezner Kerr, Sidney Madsen, Moritz Stüber, Jeffrey Liebert, Stephanie Enloe, Noélie Borghino, Phoebe Parros, Daniel Munyao Mutyambai, Marie Prudhon, Alexander Wezel	Can agroecology improve food security and nutrition? A review	2021	10.1016/j.gfs.2021.100540	Agroecology, Food security, Nutrition, Dietary diversity, Crop diversity	Review Article	Global (including Ghana, Malawi, Kenya, and Zimbabwe)	Systematic review of 11,771 articles, 275 articles fully reviewed	Agroecological practices, including crop diversification, agroforestry, and livestock integration, generally improve food security and nutrition, especially in low- and middle-income countries. Complex systems that combine multiple practices yield better outcomes, particularly at the household level, by enhancing food diversity and access to nutrient-rich foods. Social networks, such as farmer-to…	Agroecological Practices, Food Security and Nutrition, Complex Systems, Social Networks, Challenges and Research Gaps	Promote agroecology for improving food security through farmer-to-farmer networks and policy frameworks. The research paper recommends increased investment in agroecological approaches, emphasizing their benefits for biodiversity conservation, ecosystem services, and resilience. It highlights the need for further research in agroecological practices that can enhance food security and nutrition ou…	Muloi	sylvia completed
Blessing Nyamasoka-Magonziwa, Steven J. Vanek, Michael Carolan, John O. Ojiem, Steven J. Fonte	Organic Nutrient Source Allocation and Use in Smallholder Farming Communities: What Are We Missing?	2021	10.3389/fsufs.2021.692981	Soil health, cereal-legume-livestock systems, crop residues, manure, socio-cultural, ecological nutrient management	Original Research	Kenya	Focus group discussions, farmer surveys	The research focused on understanding how smallholder farmers in three agroecological zones of western Kenya allocate organic nutrient sources (ONS) such as crop residues and manure. It found that resource-endowed farmers tend to prioritize the use of ONS on more fertile plots, while land tenure, gender, and agroecological factors play significant roles in allocation decisions. Female farmers oft…	Organic nutrient source (ONS) allocation, socio-economic and socio-cultural drivers of ONS management, gender roles, land tenure, resource endowment, agroecological influences, and extension services.	Address socio-cultural factors and promote knowledge sharing to improve nutrient management practices. The research paper recommends improving nutrient management practices among smallholder farmers by enhancing adherence to social norms regarding crop residue management. It suggests that farmers should be encouraged to retain more crop residues in fields rather than using them for livestock feed…	Muloi	completed by sylvia
Patrick Bottazzi, Sébastien Boillat	Political Agroecology in Senegal: Historicity and Repertoires of Collective Actions of an Emerging Social Movement	2021	10.3390/su13116352	Just transition, organic farming, social movement, agroecology, Senegal	Research Article	Senegal	Fieldwork, participatory research	This paper highlights the role of agroecology as a transformative force in Senegal's food systems. It outlines the historical development of agroecological advocacy coalitions involving farmers, NGOs, and international organizations. These coalitions employ four key strategies: technical support and knowledge co-production, territorial governance, alternative food networks, and national policy di…	Technical support and knowledge co-production, territorial governance, alternative food networks, national policy dialogue, and the socio-political dimensions of agroecological movements in Senegal	Strengthen farmers' organizations' financial and political independence to ensure sustained agroecological transformation.	Muloi
Ludwig Chanyau, Eureta Rosenberg	Value created for small-scale farmers in an agroecology movement in the Eastern Cape region of South Africa: an application of the value creation framework	2024	10.1080/21683565.2023.2301023	Climate action, zero hunger, gender equality, value creation framework, learning networks	Research Article	South Africa	Storytelling interviews, document analysis, participant observations	Agroecology movement led to biodiversity preservation, social cohesion, market power, and gender equality in the Eastern Cape. The key findings in the paper highlight the transformative value of agroecology for small-scale farmers, particularly in the Eastern Cape. The research revealed that while the terminology of agroecology was new to many participants, especially the elderly, they recognized…		Mobilize co-creation and farmer-centered learning approaches to widen agroecology adoption. The key recommendations from the paper include the importance of involving key informants, such as trainers and farmers, in the research process to enhance credibility and validity. It is suggested that their experiences and stories should be recognized and shared, as they provide valuable insights into ag…	Charles
Desalegn A. Gugissa, Zewdu Abro, Tadele Tefera	Achieving a Climate-Change Resilient Farming System through Push–Pull Technology: Evidence from Maize Farming Systems in Ethiopia	2022	10.3390/su14052648	Agroecology, climate change, farming system, maize, push–pull technology, resilience	Research Article	Ethiopia	SHARP+ survey, focus group discussions	Push–Pull Technology (PPT) significantly improved climate resilience in maize farming systems in Ethiopia. There were significant differences between PPT and non-PPT farming systems in various resilience indicators. Specifically, PPT farming systems demonstrated better performance in 17 out of 22 climate resilience indicators. The gender of the household head was a significant factor, with a majo…		Promote PPT maize farming systems and provide access to inputs, output markets, and animal health services. 1. Enhance the integration of traditional knowledge with modern agricultural practices to improve the effectiveness of PPT interventions in farming systems. 2. Increase opportunities for reflective and shared learning among farmers to foster collaboration and knowledge exchange. 3. Focus on…	Charles	completed by sylvia
Moussa Dosso, Jacob Nandjui, Angel Avadi	Understanding the Ivorian market vegetables production: Is the agroecological transition the right strategy?	2024	10.1016/j.agsy.2024.103971	Constraints, economic performance of agroecology, farm typologies, functional analysis, market vegetables	Research Article	Côte d'Ivoire	Surveys, functional analysis, typologies	Agroecological practices are underdeveloped with economic challenges in Côte d'Ivoire's market vegetable production. Agroecological systems, whether in transition or fully established, scored low on the Characterization of Agroecological Transition (CAET) framework, with scores ranging between 37% and 41%. These scores were not statistically significant across different clusters but did show sign…	agroecological practices and sustainability,	Intensify agroecological practices and improve access to inputs and land for better outcomes. The study's main recommendations emphasize the need for further research on agroecological practices and their impact on yields, gross margins, and food security. Key areas include determining whether yields depend on input intensity or agroecological practices, investigating if crop diversification enha…	Charles
Antoinette M. Dumont, Ariani C. Wartenberg, Philippe V. Baret	Bridging the gap between the agroecological ideal and its implementation into practice: A review	2021	10.1007/s13593-021-00666-3	Agroecology, Social justice, Food justice, Socioeconomic principles, Participative research, Agroecological principles	Review	Burkina Faso, DRC	Review of literature on agroecology and socioeconomic principles	Barriers to achieving the agroecological ideal include inconsistent definitions and lack of standardized methodologies for evaluating systems. There is a bias in existing literature towards economic impacts of agricultural systems, often neglecting broader aspects of wellbeing. Frameworks for assessing sustainability exist focus on impact- or means-indicators rather than agroecological principles…		Supportive policies and participatory assessments are needed to scale up agroecology. Bridging between these normative principles and empirical research involves an interpretation of agroecology as an ideal horizon guiding real-world transitions towards sustainability. Interdisciplinary assessment is required to determine whether systems are agroecological and this can be done in two ways: evalua…	Raymond	completed by sylvia1
Emma Johansson, Respikius Martin, Kenneth Mapunda	Climate vulnerability of agroecological and conventional smallholders in Mvomero district, Tanzania	2024	10.3389/fsufs.2024.1423861	Climate vulnerability, Agroecology, Botanicals, Participatory methods, Small-scale farming, Mixed methods	Original Research	Tanzania	Surveys, field observations, interviews, rainfall data analysis	Agroecological farmers in Tanzania are less vulnerable to short-term dry spells, but there are limits to scaling up botanical practices. The key findings from the article indicate that agro ecological farmers may be less vulnerable to climate change compared to conventional farmers. This conclusion is based on differences in yield stability, expenses, incomes, food security, and social networks. …	economic, social, and environmental dimensions of agroecological transitions.	Promote agroecological practices that improve soil water retention, and address limitations in scaling botanical practices. The research paper recommends further investigation into the engagement of women in agroecology as a means to achieve sustainable development goals related to gender equality and women's empowerment. It highlights the need to better understand gendered climate vulnerabilitie…	Blasio	completed by sylvia1
Gian L. Nicolay	Understanding and Changing Farming, Food & Fiber Systems: The Organic Cotton Case in Mali and West Africa	2019	10.1515/opag-2019-0008	Farming system, Socio-ecological system, Organic agriculture, Communication, Sociology, Organic cotton, Mali	Research Article	Mali	Case study, communication and interaction analysis	The organic cotton case study in Mali highlights the importance of communication and collaboration among various stakeholders. The key findings of the study on organic cotton systems and F&A systems in Mali include the identification of several factors contributing to failures in the cotton system, such as low productivity, poverty among producers, soil degradation, and declining yields. The stud…	Interdisciplinary approach in organic farming. Multistakeholder dialogue	Promote communication and collaboration among farmers, researchers, and policymakers to improve organic cotton systems. Collaborate to develop integrated farming solutions that address challenges in the FASS system, particularly organic cotton production, while fostering dialogue among scientists, practitioners, and policymakers for knowledge sharing. A unified scientific framework should be adop…	Charles
Grace O’Connor, Kimberley Reis, Cheryl Desha, Ingrid Burkett	Valuing farmers in transitions to more sustainable food systems: A systematic literature review of local food producers’ experiences and contributions in short food supply chains	2024	10.1007/s10460-024-10601-3	Short food supply chains, Local food producer, Sustainable food systems, Resilience, Transitions	Review	Global + South Africa	Systematic literature review, thematic analysis	Local food producers in short food supply chains face challenges such as economic viability but contribute significantly to social-ecological resilience. The key findings from the paper highlight four main themes regarding the experiences of local food producers within short food supply chains (SFSCs) and their contributions to social-ecological resilience. These themes include concerns about exp…		Strengthen social networks and improve economic viability to support local food producers in short food supply chains. The paper recommends fostering fair and inclusive conditions for local food producers within short food supply chains (SFSCs), particularly those using ecologically sustainable methods like agroecology. It suggests recognizing producers' environmental motivations, ensuring just w…	Charles
Abdelkarim Hamrita, Daniel Ferrer Jiménez, Hichem Rejeb	Peri-urban agrifood systems and a landscape project in the southern Mediterranean: The case of the urban agglomeration of Sousse (Tunisia)	2022	10.3389/frsc.2022.898079	Peri-urban agrifood systems, Landscape project, Food security, Climate change, Tunisia	Research Article	Tunisia	Landscape Character Assessment, integrative landscape project	Urbanization and weak governance are threatening the peri-urban agrifood systems in Sousse, Tunisia. The study on peri-urban agricultural landscapes in Sousse, Tunisia, reveals key findings including the region’s integration of urban, agricultural, and natural landscapes, marking it as an archetype of peri-urbanization. Significant land use changes have altered local perceptions of ecosystem serv…	Peri-urban agricultural landscapes (multifunctionality and the integration of ecological functions). Sustainable agricultural practices and stakeholder participation.	Integrate peri-urban agricultural landscapes into land-use planning to strengthen food security and resilience. The key recommendations from the paper focus on the integration of multifunctionality and sustainability in peri-urban agricultural areas. It emphasizes the importance of adopting green infrastructure practices to enhance ecological functions and manage risks associated with extreme cli…	Charles
Ellinor Isgren, Yann Clough, Alice Murage, Elina Andersson	Are agricultural extension systems ready to scale up ecological intensification in East Africa?	2023	10.1007/s12571-023-01387-z	Advisory services, Technology adoption, Sustainable intensification, Pest management, Agroecology	Review	Kenya, Uganda, Tanzania	Literature review, analysis of agricultural extension systems	The analysis revealed that there are significant challenges in the extension systems, which limit the adoption of sustainable agricultural practices. The study highlighted the importance of understanding the socio-economic context and broader social forces that influence the dissemination and uptake of PPT, as most existing analyses have focused on individual farms or households rather than socie…	extension for sustainable agriculture	Strengthen agricultural extension systems to support the scaling of ecological intensification approaches. The major recommendations in the paper include enhancing the capacity of agricultural extension systems to support the upscaling of ecological intensification approaches, particularly the push-pull technology (PPT). This involves addressing gaps in knowledge and resources, improving training…	Charles
Karl S. Zimmerer, Yildiz Aumeeruddy-Thomas, Sophie Caillon, Yolanda Jiménez-Olivencia, Laura Porcel-Rodríguez, Chris S. Duvall	Agrobiodiversity threats amid expanding woody monocultures and hopes nourished through farmer and food movements in the Mediterranean	2024	10.1525/elementa.2023.00093	Sustainable food systems, Food agrobiodiversity, Food movements, Agricultural biodiversity, Mediterranean	Commentary	Spain, Morocco, France	Commentary on monoculture expansion, analysis of farmer movements	Monoculture expansion in the Mediterranean is threatening agrobiodiversity, but farmer movements are supporting biodiversity conservation. The article discusses the significance of farmer and food movements in the context of agrobiodiversity and food system sustainability, particularly in the Mediterranean region, which includes parts of Africa like Morocco. These movements are essential in comba…	farmer and food movements.	Leverage farmer movements to support agrobiodiversity conservation and strengthen sustainable food systems policies. The major recommendations from the paper include utilizing the Plantationocene concept and framework to better understand the dynamics of monoculture and agrobiodiversity, particularly in the context of farmer and food movements. The authors suggest that interdisciplinary and trans…	Charles	completed by sylvia
Rachel Bezner Kerr, Lars Otto Naess, Bridget Allen-O’Neil, Edmond Totin, Hanson Nyantakyi-Frimpong, Camilla Risvoll, Marta G. Rivera Ferre, Feliu López-i-Gelats, Siri Eriksen	Interplays between changing biophysical and social dynamics under climate change: Implications for limits to sustainable adaptation in food systems	2022	10.1111/gcb.16124	Climate change, Food system, Limits to adaptation, Political ecology, Vulnerability	Research Article	Ghana, Malawi	Case study analysis, climate change scenarios	Interactions between biophysical and social factors in Ghana and Malawi are creating limits to sustainable adaptation in food systems. The key findings in this paper include the identification of adaptation limits across diverse social and climate contexts through four case studies located in Ghana, Malawi, and Catalonia. The study emphasizes the importance of understanding historical trajectorie…	climate change vulnerability and adaptation, power dynamics	Address the interaction between biophysical and social factors to improve adaptation in food systems. The paper recommends focusing on sustainable climate change adaptation by recognizing that not all practices are universally viable and must evolve with changing circumstances. It urges addressing the social, political, and economic factors contributing to vulnerability, while identifying specifi…	Charles
Rodger R.B. Leakey	A re-boot of tropical agriculture benefits food production, rural economies, health, social justice, and the environment	2020	10.1038/s43016-020-0076-z	Tropical agriculture, Food production, Rural economies, Social justice, Environmental sustainability	Perspective	Global, Focus on Africa, Cameroon	Literature review, expert commentary	Addressing food insecurity in tropical regions, particularly in Africa, requires a holistic rethinking of agricultural systems to integrate social justice and ecological sustainability. The paper discusses the contrasting agricultural systems in industrialized and non-industrialized economies, highlighting that in industrialized countries, a small percentage of the population manages large, capit…	Sustainable agriculture and social equity	Promote sustainable farming systems that integrate social justice and ecological concerns to tackle food insecurity and environmental degradation. Key recommendations from the paper emphasize the importance of traditional food species for enhancing nutritional security and health, alongside the use of simple, appropriate technologies to close yield gaps in staple crops while maximizing economic, …	Charles
Christian Schader, Anja Heidenreich, Irene Susana Egyir	How is organic farming performing agronomically and economically in sub-Saharan Africa?	2021	10.1016/j.gloenvcha.2021.102325	Organic farming, Sub-Saharan Africa, Agronomic performance, Economic performance	Research Article	Sub-Saharan Africa	Field trials, economic analysis	Organic farming can perform well agronomically and economically in sub-Saharan Africa, but challenges remain in scaling and market access. The key findings of the study indicate that the adoption of organic practices among smallholder farmers was not widespread, despite interventions aimed at promoting organic agriculture. In the case studies, compliance with organic standards varied, with a sign…	Productivity, profitability, smallholder farmer, Impact assessment, Agroecology	Input Availability through Increased access to quality organic inputs, like organic fertilizers, is essential to support sustainable crop yields. Enhance Farmer Training in Agroecological Practices to promote better agroecosystem management could improve the productivity of organic farms. Training should emphasize agroecological practices, which are generally effective in boosting yields. Strengt…	Raymond	completed by Sylvia
Scott Sabin, Birori Dieudonne, John Mitchell, Jared White, Corey Chin, Robert Morikawa	Community-Based Watershed Change: A Case Study in Eastern Congo	2019	10.3390/f10060475	Watersheds, Community-based restoration, Agroecology, Peace and reconciliation, Eastern Congo	Case Study	Democratic Republic of Congo	Mixed methods, participatory workshops, remote sensing, community activity reports	Community-based environmental restoration in Eastern Congo can improve ecosystem health and contribute to peace and reconciliation. Increased tree planting, better forest management, and reduced field burning improved soil quality and reduced erosion. Village Savings and Loan Associations (VSLAs) bolstered financial security, diversified income sources, and enhanced food security. Leadership role…	watersheds; community-based restoration; Village Savings and Loans Associations; ecosystem health; sustainable farming; agroecology; peace and reconciliation; community forest management	Scale community-based approaches to environmental restoration for broader social and ecological impacts in post-conflict areas like Eastern Congo. Extend Project Duration for longer-term engagement is essential to capture measurable changes in vegetation and ecosystem health. Strengthen Local Leadership and Governance through continued training for local leaders can help maintain enforcement of f…	Raymond	completed by Sylvia
Sébastien Boillat, Raphaël Belmin, Patrick Bottazzi	The agroecological transition in Senegal: transnational links and uneven empowerment	2021	10.1007/s10460-021-10247-5	Agroecological transition, Political agroecology, Transnational links, Empowerment, Senegal	Research Article	Senegal	Social network analysis, qualitative interviews	Transnational links in Senegal’s agroecological transition contribute to empowerment, but NGOs benefit more than farmer unions, limiting farmer agency. The paper highlights the hierarchical donor-broker-recipient structure that characterizes the agroecological niche in Senegal, emphasizing how this structure can overshadow traditional regime-niche dynamics. It identifies that donors control criti…	Capital. power dynamics and social movements and institutional frameworks in promoting agroecological transitions	Foster stronger farmer union participation in agroecology networks to balance empowerment and strengthen local ownership of the transition process. Recommendations for enhancing the effectiveness of agroecological networks and promoting sustainability transitions. Firstly, the paper suggests the importance of strengthening membership ties among organizations as a means to build social capital, wh…	Charles
Sébastien Boillat, Patrick Bottazzi, Ibrahima Khalil Sabaly	The division of work in Senegalese conventional and alternative food networks: a contributive justice perspective	2023	10.3389/fsufs.2023.1127593	Alternative food networks, Labor, Contributive justice, Senegal	Research Article	Senegal	71 interviews, labor analysis	Alternative food networks in Senegal show a less sharp division of labor compared to conventional networks, but they remain elitist and exclusionary, limiting their transformative potential. The research found stark labor divisions in Senegalese food networks, with conventional networks exhibiting sharp gender and social inequalities, where men dominate higher-status roles and women are relegated…	Food networks and labour divisiion	Ensure that alternative food networks are more inclusive and equitable to fully realize their potential in transforming food systems and contributing to justice. The main recommendations from the research include adopting a holistic approach to food system transformation that prioritizes equity, re-territorialization, and inclusive governance. The study emphasizes reducing geographic and social l…	Charles
Tavseef Mairaj Shah, Sumbal Tasawwar, Ralf Otterpohl	Agroecology for Food and Water Security in Times of Climate Consciousness: A Bibliometric Analysis of Peer-Reviewed Literature	2021	10.3390/su13095064	Agroecology, Food security, Water security, Climate change, Bibliometric analysis	Review	Global, including Africa	Bibliometric analysis, data visualization	Agroecology is increasingly recognized as vital for addressing food and water security, especially in the face of climate change, but more research is needed on its cross-cutting benefits. The study retrieved a total of 1,974 documents published between 1990 and 2020, indicating a significant increase in publications in the field of agroecology, particularly in the last few years. The primary lan…		Expand agroecological research to address the interconnected challenges of food security, water scarcity, and climate change, particularly in vulnerable regions like Africa.The recommendation for this paper is to acknowledge the increasing relevance of agroecological interventions in addressing food and water security, particularly in the context of climate change. The bibliometric analysis highl…	Sylvia
Sieglinde Snapp, Yodit Kebede, Eva Wollenberg, Kyle M. Dittmer, Sarah Brickman, Cecelia Egler, Sadie Shelton	Agroecology and climate change rapid evidence review: Performance of agroecological approaches in low- and middle-income countries	2021	10.7910/DVN/CJ5NOU	Agroecology, Climate change, Low-income countries, Middle-income countries, Evidence review	Rapid Evidence Review	Kenya, Ethiopia	Literature review, interviews with donors and experts	Agroecology can enhance climate change adaptation and mitigation in low- and middle-income countries, but its scalability depends on investment in local knowledge and institutions. The major findings of the study indicate that agroecology has potential benefits for climate change adaptation and mitigation, although the evidence is mixed and limited in certain areas. The study examined various res…	climate change adaptation and mitigation through agroecological approaches	Prioritize investment in local knowledge systems, institutional support, and policies that enable agroecology to scale effectively in low- and middle-income countries. The study recommends that donors investing in agroecology should focus on positioning and defining their work in ways that transcend divergent definitions and political versus scientific perspectives. This approach should avoid the…	Charles
Asma Souissi, Boubaker Dhehibi, Ali M. Oumer, Rihab Mejri, Aymen Frija	Linking farmers’ perceptions and management decision toward sustainable agroecological transition in Tunisia	2024	10.3389/fnut.2024.1389007	Agroecological transition, Farmer perceptions, Tunisia, Olive oil value chain	Original Research	Tunisia	Focus groups, workshops, surveys, questionnaires	Agroecological practices improved farmer perceptions and management, but barriers like input scarcity and lack of policy support remain.The study revealed consensus among farmers on the significant role of farmers organizations in influencing farm management aspects, particularly in altering relationships with peers and shaping long-term farm visions. However, variability in prioritization was no…	Stakeholder cooperation and implementation challenges, Cultural and economic benefits, Logistical difficulties and scaling-up challenges.	The study recommends increasing public incentives and supportive legislation to promote agroecological practices. It suggests offering innovative financing and credit opportunities to farmers to address the lack of production inputs and limited access to microfinancing. Additionally, it highlights the need for capacity-building programs to provide farmers with the necessary knowledge and skills t…	James	completed by sylvia
Stephanie K. Enloe, David Banda, Pressings Moyo, Laifolo Dakishoni, Rodgers Msachi, Rachel Bezner Kerr	Photovoice as a method for co-constructing agroecological knowledge in northern Malawi	2021	10.1080/21683565.2021.1901831	Agroecology, Photovoice, Co-constructed knowledge, Pest management, Malawi	Original Research	Malawi	Photovoice, interviews, workshops	The research in northern Malawi used photovoice as a participatory method to engage farmers in co-constructing agroecological knowledge. Forty-two farmers were trained to take photos of meaningful biodiversity on their farms, which led to discussions on pests, beneficial species, and pest management strategies. Workshops facilitated horizontal learning, allowing farmers to exchange knowledge and …	Agroecological knowledge co-construction, biodiversity, pest management, participatory research, horizontal learning, and the integration of local and scientific knowledge.	The study recommends extending the duration of participatory research to better capture biodiversity and agroecological challenges across the entire growing season. It emphasizes the need to deepen integration of local socio-cultural knowledge, particularly regarding pest management and natural enemies. Addressing knowledge disparities through enhanced communication and horizontal learning among …	Muloi
Parfait K. Tapsoba, Augustin K. N. Aoudji, Madeleine Kabore, Marie-Paule Kestemont, Christian Legay, Enoch G. Achigan-Dako	Sociotechnical Context and Agroecological Transition for Smallholder Farms in Benin and Burkina Faso	2020	10.3390/agronomy10091447	Agroecological transition, Benin, Burkina Faso, Sociotechnical context	Review	Benin, Burkina Faso	Systematic review, literature analysis	The study highlights that West Africa faces food insecurity amidst resource degradation. Agroecological interventions in Benin and Burkina Faso focus on sustainable farming practices, such as composting, water conservation, agroforestry, and seed saving, as alternatives to the Green Revolution’s conventional methods. However, scaling these practices is challenged by limited market access, lack of…	Agroecological transition, institutional and political challenges, stakeholder dynamics, sustainability practices, and opportunities for scaling agroecology in West Africa, particularly in Benin and Burkina Faso.	Strengthen agroecological networks and improve policy frameworks to scale up sustainable farming in West Africa.	Muloi
Teatske Bakker, Patrick Dugué, Stéphane de Tourdonnet	Assessing the effects of Farmer Field Schools on farmers’ trajectories of change in practices	2021	10.1007/s13593-021-00667-2	Farmer Field Schools, Agroecology, Innovation, Burkina Faso, Togo	Research Article	Burkina Faso, Togo	Interviews, Efficiency-Substitution-Redesign framework analysis	The study evaluates the impact of Farmer Field Schools (FFS) on farmers' innovation and transitions toward more sustainable agricultural practices in West Africa. It compares two types of FFS implementations: consultative and collaborative. The study found that collaborative FFS, which involve farmers in decision-making, fostered more significant changes in practices like compost production, use …	Agroecological transitions, participatory innovation support, Farmer Field Schools (FFS), sustainable cropping practices, collaborative vs. consultative approaches, compost and biopesticide use, legume intercropping, and farmer-led decision-making.	The authors recommend emphasizing collaborative approaches in Farmer Field Schools (FFS) to foster more significant and diverse changes in agricultural practices. They suggest integrating long-term evaluations to assess the sustainability of innovations and focusing on farm-level innovation processes. The authors also recommend addressing sociotechnical barriers, particularly in resistant systems…	Muloi
Fergus Sinclair, Alexander Wezel, Cheikh Mbow, Susan Chomba, Valentina Robiglio, Rhett Harrison	The Contribution of Agroecological Approaches to Realizing Climate-Resilient Agriculture	2019	N/A	Agroecology, Climate resilience, Ecosystem services, Africa	Background Paper	Africa (Tanzania, Zimbabwe, Burkina Faso, Mali, Madagascar, Sudan, Niger, Malawi, Zambia, Cameroon, Senegal, Chad, and the Democratic Republic of Congo)	Literature review, case studies	Agroecological practices, such as contour hedgerows and landscape-level tree cover, enhance resilience to climate change, but adoption requires policy support and farmer education. The paper discusses the role of agroecological approaches in achieving climate-resilient agriculture, emphasizing the need for sustainable intensification in agricultural systems. It highlights the importance of integr…	agroecological practices and climate adaptation	Promote agroecological approaches as part of climate resilience strategies, with a focus on policies that incentivize sustainable farming practices. The paper recommends several strategies for enhancing climate-resilient agriculture through agroecological approaches. It emphasizes the importance of using systems thinking in agricultural planning to address the complex interactions within ecosyste…	Charles
Tolera S. Jiren, Jan Hanspach, Jannik Schultner, Joern Fischer, Arvid Bergsten, Feyera Senbeta, Kristoffer Hylander, Ine Dorresteijn	Reconciling food security and biodiversity conservation: participatory scenario planning in southwestern Ethiopia	2020	N/A	Food security, Biodiversity conservation, Ethiopia, Participatory scenario planning	Research Article	Ethiopia	Participatory workshops developed and validated scenarios addressing food security, biodiversity	Integrating food security and biodiversity conservation requires reconciling competing land-use priorities through participatory planning and local engagement. The study found that different land-use scenarios led to distinct outcomes for food security and biodiversity in southwestern Ethiopia. Among the four scenarios developed, the "coffee and conservation" scenario provided the most balanced o…	Food security, biodiversity, governance, sustainability	Implement participatory scenario planning to balance biodiversity conservation and food security needs in vulnerable regions like southwestern Ethiopia. The study’s recommendations emphasize adopting an agroecological development pathway to balance food security and biodiversity conservation. This approach, exemplified by the "coffee and conservation" scenario, advocates for diversified farming p…	Blasio	completed by sylvia
Kris A.G. Wyckhuys, Yi Zou, Thomas C. Wanger, Wenwu Zhou, Yubak Dhoj Gc, Yanhui Lu	Agroecology science relates to economic development but not global pesticide pollution	2022	10.1016/j.jenvman.2022.114529	Agroecology, Pesticide pollution, Economic development, Environmental Kuznets curve, Sustainable intensification	Research Article	Global, with insights for Africa	Bibliometric analysis, econometric analysis	The study investigates the relationship between agroecology science, economic development, and pesticide use across 153 countries. The findings indicate that while economic growth promotes scientific advancements in agroecology, this progress does not consistently lead to reductions in pesticide use. Some emerging economies show a decline in pesticide use following the Environmental Kuznets Curve…	Agroecology science, pesticide use, economic development, Environmental Kuznets Curve (EKC), Integrated Pest Management (IPM), and policy-driven sustainable agriculture.	The study emphasize the need for large-scale investments in nature-based, agroecological farming to reduce pesticide use and enhance environmental sustainability. It calls for stronger policy frameworks that support agroecology, paired with farmer education and awareness-raising initiatives to drive adoption. The paper suggests improving collaboration between researchers, policymakers, and farmer…	Muloi
Mireille De Graeuwe, Kevin Maréchal	A comparative analysis of Senegalese farm schools: unveiling effective practices for agroecology training	2024	10.1080/21683565.2024.2344716	Agroecology, Farm schools, Senegal, Training, Knowledge acquisition	Research Article	Senegal	Feedback from learners, knowledge acquisition metrics, business establishment rates	The study analyzed four farm schools in Senegal, assessing the effectiveness of their agroecological training. It highlighted the importance of active pedagogy and agroecological expertise for successful outcomes. Key factors for effective training include providing practical tools, business establishment support through networks, and starter kits. The study found that schools with strong institu…	Agroecology training quality, active pedagogy, professionalization, knowledge acquisition, business establishment support, and the role of networks and partnerships in farm schools.	The study recommendions emphasize the need for farm schools to focus on active pedagogy that integrates practical and theoretical training to enhance agroecological knowledge and skills. It suggests employing trainers with deep agroecological expertise and building strong partnerships with institutions and peasant networks to support professionalization and business establishment. Providing start…	Muloi
Mireille Matt	The Role of Markets and Value Chains in Shaping Sustainable Agrifood Systems	2023	10.3917/jie.042.0001	Agrifood systems, Sustainable markets, Value chains, Innovation, Transition studies	Special Issue	Africa, Europe, South America	Event history analysis, critical and strategic analysis, qualitative research	The research highlights the importance of markets and value chains in fostering sustainable agrifood systems, emphasizing their collective nature. Agrifood systems, encompassing production, processing, and distribution, are shaped by actors such as farmers, agribusinesses, and intermediaries. Sustainable transitions require innovations in production (e.g., agroecology, regenerative agriculture) a…	Sustainable agrifood markets, value chains, agroecological transitions, innovation systems, institutional arrangements, market creation, and the role of intermediaries in fostering sustainability across diverse global contexts.	The study's recommendations emphasize the need for a multi-stakeholder approach to developing sustainable agrifood systems, involving collaboration between farmers, institutions, intermediaries, and market actors. It advocates for the co-creation of market rules and governance structures that align economic incentives with sustainability goals, fostering innovation and scaling agroecological prac…	Muloi
Nassib Mugwanya	Why agroecology is a dead end for Africa	2019	10.1177/0030727019854761	Agroecology, Africa, Smallholder farmers, Poverty, Agricultural transformation	Perspective	Africa	Narrative perspective, Qualitative, anecdotal, observational, literature-based	Agroecology is seen as too restrictive and insufficient for transforming African agriculture, keeping farmers in poverty instead of offering pathways to prosperity. study reveal that while agroecological practices are often promoted as sustainable and socially just solutions for African agriculture, they may not be sufficient to lift smallholder farmers out of poverty. The research indicates that…	Agroecology, productivity, poverty, infrastructure, technology, sustainability, policy.	Shift focus to modern agricultural innovations and policies that offer substantial productivity improvements for smallholder farmers in Africa. The study recommends a pragmatic approach to transforming African agriculture, emphasizing the need for a balanced integration of modern agricultural technologies with traditional practices. It suggests increasing access to essential inputs, such as synth…	Blasio	Completed by sylvia
Paul Mapfumo, Toga Mapangisana, Florence Mtambanengwe, Sarah MacCan, Shephard Siziba, Yvonne Muto, Edward Makoni, Hatirarami Nezomba, Rose Hogan	Farms in transition: agroecological farming giving families an edge in the face of declining agricultural productivity and climate stress in Bikita, Zimbabwe	2022	10.1080/21683565.2022.2107596	Agroecology, Climate stress, Smallholder farmers, Food security, Zimbabwe	Research Article	Zimbabwe	Field studies, surveys, interviews	The research conducted in Bikita District, Zimbabwe, highlights the potential of agroecological farming as a transformative approach for smallholder farmers. Agroecological farmers, who typically have fewer resources, use local knowledge, social networks, and natural environments to improve food security and livelihoods while reducing reliance on conventional agricultural inputs. Key differences …	Agroecological farming practices, crop diversity, food security, livelihood resilience, challenges of labor and livestock, institutional support, and policy barriers for smallholder farmers in semi-arid Zimbabwe.	The study recommends strengthening institutional and policy support for agroecological farming to create a more enabling environment for smallholder farmers. It emphasizes the need for capacity building among farmers, particularly in labor-saving techniques and sustainable soil management practices. Enhancing access to organic inputs and improving livestock management systems are also suggested. …	Muloi
Koladé Akakpo, Sami Bouarfa, Marc Benoît, Crystele Leauthaud	Challenging agroecology through the characterization of farming practices’ diversity in Mediterranean irrigated areas	2021	10.1016/j.eja.2021.126284	Agroecology, Irrigation, Tunisia, Cropping systems, Environmental impact	Research Article	Tunisia	Semi-directive interviews, Typology method	The research examines the diversity of farming practices in irrigated areas of the Southern Mediterranean, focusing on chili-pepper cropping systems in the Merguellil plain of Tunisia. It identified a range of Technical Management Routes (TMRs), some compatible with agroecological principles and others reliant on conventional chemical inputs. Through multivariate analysis and clustering, seven ty…	Farming practices diversity, agroecology compatibility, environmental sustainability, fertilization management, irrigation strategies, and technical management routes (TMRs) in Mediterranean irrigated areas.	The study emphasize promoting agroecology-compatible practices in Mediterranean irrigated areas to enhance environmental sustainability. It suggests that policy interventions should encourage farmers to adopt more resource-efficient and environmentally-friendly Technical Management Routes (TMRs), especially in the context of water and fertilizer management. Public policies should also support a g…	Muloi
Laura Brandt Sørensen, Lisa Blix Germundsson, Stine Rosenlund Hansen, Claudia Rojas, Niels Heine Kristensen	What Skills Do Agricultural Professionals Need in the Transition towards a Sustainable Agriculture?	2021	10.3390/su132413556	Agricultural professionals, Sustainable agriculture, Skills, Knowledge integration	Literature Review	Global (mentions the Sahara)	Qualitative literature review	The study emphasizes the essential skills agricultural professionals need to foster sustainable agriculture, identifying five key areas: a systems perspective, lifelong learning, knowledge integration, network-building, and technical expertise. These skills encourage holistic, interdisciplinary approaches, enabling professionals to address complex agricultural challenges. A systems perspective em…	Systems thinking, lifelong learning, integrating diverse knowledge, building collaborative networks, and advancing technical expertise for sustainable agriculture	The study recommends adopting a holistic, inclusive approach to developing skills necessary for sustainable agriculture. It emphasizes incorporating systems thinking, lifelong learning, and knowledge integration into educational and professional practices. Building and maintaining diverse networks and learning communities is crucial to foster collaboration and innovation. The paper advocates for …	Muloi
David Mfitumukiza, Gordon Y. Mwesigwa, Ellen J. Kayendeke, Vincent B. Muwanika	Local Context Capacity Building Needs for Climate Change Adaptation among Smallholder Farmers in Uganda	2024	10.3390/cli12010010	Climate adaptation, Smallholder farmers, Uganda, Capacity building	Research Article	Uganda	Semi-structured questionnaires, multi-zone survey	The study identified critical capacity-building needs for climate change adaptation among smallholder farmers in Uganda. The research highlights that climate change, with its impacts such as unpredictable rainfall and drought, poses significant threats to agriculture. Across five agro-ecological zones, farmers require capacity building in soil-water conservation, irrigation technologies, post-har…	Climate change impacts, adaptive capacity building, soil-water conservation, context-specific interventions, education and technology needs, regional variations, and community-based adaptation strategies.	The study recommends developing context-specific climate adaptation strategies tailored to the unique needs of different agro-ecological zones. It emphasizes the importance of investing in education, research, and technology to build adaptive capacity, particularly focusing on soil-water conservation, irrigation, and post-harvest management. Policymakers are urged to engage local communities in d…	Muloi
M.M. Kansanga, I. Luginaah, R. Bezner Kerr, E. Lupafya, L. Dakishoni	Beyond ecological synergies: examining the impact of participatory agroecology on social capital in smallholder farming communities	2020	10.1080/13504509.2019.1655811	Agroecology, Social capital, Smallholder agriculture, Malawi	Research Article	Malawi	Longitudinal study, Difference-in-Difference (DID) method, Linear regression analysis	The research highlights the positive impact of participatory agroecology on social capital among smallholder farmers in Malawi. A five-year intervention using a farmer-to-farmer approach significantly improved social networks, trust, and collective action compared to a control group. The study found a bidirectional relationship, where increased social capital supported the adoption of agroecologi…	Social capital enhancement, participatory agroecology, farmer-to-farmer knowledge sharing, gender equity, community cohesion, and sustainable agricultural practices.	The study recommends leveraging participatory agroecology as a strategy to enhance social capital in smallholder farming communities. Policymakers and agricultural stakeholders should prioritize farmer-to-farmer knowledge sharing, local enterprise development, and gender-equitable practices to strengthen networks and build trust. The paper emphasizes the importance of integrating social capital c…	Muloi
Marianne V. Santoso, Rachel N. Bezner Kerr, Neema Kassim, Haikael Martin, Elias Mtinda, Peter Njau, Kelvin Mtei, John Hoddinott, Sera L. Young	A Nutrition-Sensitive Agroecology Intervention in Rural Tanzania Increases Children's Dietary Diversity and Household Food Security	2021	10.1093/jn/nxab052	Agroecology, Dietary diversity, Food security, Tanzania, Women's empowerment	Cluster-randomized trial	Tanzania	Longitudinal fixed-effects regression analyses	The study evaluates a nutrition-sensitive agroecology intervention in rural Tanzania that aimed to enhance children's dietary diversity and improve household food security. Results showed a significant increase in children's dietary diversity scores by 0.57 food groups and a 9.9% rise in the proportion meeting minimum dietary diversity after the intervention. Household food insecurity also decrea…	Nutrition-sensitive agroecology, emphasizing its role in enhancing children's dietary diversity and improving household food security, while also addressing sustainable agricultural practices and women's empowerment and well-being through a rigorous impact assessment.	The study recommends that nutrition-sensitive agroecology interventions be expanded to integrate comprehensive support for sustainable agricultural practices, emphasizing training and resources for local farmers. It advocates for policies that promote women's empowerment, as this can enhance dietary diversity and food security outcomes. Furthermore, the study suggests increasing collaboration amo…	Muloi
Marney E. Isaac, Hanson Nyantakyi-Frimpong, Petr Matouš, Evans Dawoe, Luke C.N. Anglaaere	Farmer networks and agrobiodiversity interventions: the unintended outcomes of intended change	2021	10.5751/ES-12734-260412	Agrobiodiversity, Farmer networks, Ghana, Knowledge sharing	Research Article	Ghana	Mixed methods, interviews, network analysis	The research explores the unintended outcomes of agrobiodiversity interventions in Ghana's cocoa farming through social network analysis. Findings indicate that farmers in larger, less dense networks with ties to external organizations report higher levels of agrobiodiversity, suggesting that both innovation and cooperation are essential for successful interventions. However, these benefits do no…	Agrobiodiversity Interventions, Social Networks, Innovation and Cooperation, Community Dynamics, Environmental Metrics	The study recommends enhancing agricultural extension services by adopting a more inclusive approach that emphasizes the importance of social networks in knowledge transfer and innovation. It suggests fostering the development of both established and emergent networks to improve collaboration among farmers and external organizations. Additionally, the authors advocate for the careful selection of…	Muloi
Mary Richardson, Richard Coe, Katrien Descheemaeker, Bettina Haussmann, Kate Wellard, Marah Moore, Jane Maland Cady, Peter Gubbels, Frank Tchuwa, Rodrigo Paz Y., Rebecca Nelson	Farmer research networks in principle and practice	2022	10.1080/14735903.2021.1930954	Farmer research networks, Agroecology, Participatory research, Smallholder farming, Africa	Research Article	Multiple African countries including Burkina Faso, Malawi, Kenya, Tanzania, Uganda, and Mali.	Mixed methods, interviews, surveys, participatory research	The study investigates Farmer Research Networks (FRNs) as a participatory approach aimed at enhancing agroecological intensification among smallholder farmers in Africa and the Andes. Established by the McKnight Foundation, these networks varied significantly in size and scope, engaging diverse farmer groups in collaborative research. Key findings indicate that leveraging existing relationships, …	Farmer engagement and empowerment, Collaborative and participatory research, Inclusion of marginalized groups, Trust-building among stakeholders, Adaptive research methods, Knowledge co-creation, Agroecological intensification and sustainability	The study recommends fostering deeper engagement with farmers through ongoing capacity-building initiatives that empower them to actively participate in the research process. It emphasizes the importance of building trust among stakeholders to facilitate effective collaboration within Farmer Research Networks (FRNs). Additionally, the paper advocates for the integration of diverse knowledge syste…	Muloi
Maryline Darmaun, Tiphaine Chevallier, Laure Hossard, Juliette Lairez, Eric Scopel, Jean-Luc Chotte, Adeline Lambert-Derkimba, Stéphane de Tourdonnet	Multidimensional and multiscale assessment of agroecological transitions. A review	2023	10.1080/14735903.2023.2193028	Agroecological transitions, Multiscale assessment, Evaluation framework	Review	Global Incl Africa (Kenya and tanzania)	Systematic literature review	The study reviews 14 existing multiscale and multidimensional assessment methods for agroecological transitions, emphasizing the need for adaptable and participatory approaches to effectively manage these transitions. The assessment criteria highlighted include adaptability to local conditions, consideration of social interactions, clarification of the agroecological concept, understanding tempor…	Assessment methods for agroecological transitions, Local adaptability and contextualization, Social interactions among stakeholders, Clarification of agroecology concepts, Temporal dynamics and participatory approaches.	The study recommends several key actions to enhance the assessment of agroecological transitions. Firstly, it suggests developing integrated assessment methods that encompass all five evaluation criteria, ensuring they are adaptable to local contexts and incorporate social interactions. Secondly, the authors advocate for a participatory bottom-up approach, involving stakeholders throughout the as…	Muloi	completed by sylvia
Rachel E. Mason, Alissa White, Gabriela Bucini, Janica Anderzén, V. Ernesto Méndez, Scott C. Merrill	The evolving landscape of agroecological research	2020	10.1080/21683565.2020.1845275	Agroecology, Food systems, Bibliometric analysis, Research networks, Knowledge integration	Research Article	Global, Africa, Ethiopia	Bibliometric and network analysis	Agroecology research has increasingly integrated social and political issues alongside ecological principles, reflecting the field’s expansion beyond traditional farming concerns. The key findings of the study indicate that agroecological scholarship has evolved over time, with researchers continuously questioning and defining the concept of agroecology. The analysis reveals a decline in disconne…	evolution of agroecological research fronts	Further encourage interdisciplinary approaches in agroecology research to address the complex social, political, and ecological factors shaping food systems. The key recommendations from this study include the need for continued collaboration and integration of research efforts within the field of agroecology to enhance knowledge sharing and reduce disconnected groups of research. It emphasizes t…	Charles
Daniel Amoak, Isaac Luginaah, Gordon McBean	Climate Change, Food Security, and Health: Harnessing Agroecology to Build Climate-Resilient Communities	2022	10.3390/su142113954	Agroecology, Climate resilience, Food security, Health	Review	Sub-Saharan Africa	Literature review	Agroecology can significantly enhance food security and health outcomes in climate-vulnerable communities in Africa by integrating science and local knowledge.The paper concludes that agroecology offers a promising pathway for building climate-resilient communities by enhancing food security, promoting environmental sustainability, and empowering local farmers. Key findings highlight that agroeco…	Agroecology, climate resilience, food security, empowerment, mental health, policy integration.	Incorporate agroecology into climate change strategies for rural and marginalized communities to improve resilience and food security. The paper recommends integrating agroecology into climate adaptation policies to build resilient food systems, especially in vulnerable regions. It calls for increased investment in agroecological research and development, emphasizing the need for place-specific a…	Blasio	SYLVIA
Imogen Bellwood-Howard, Santiago Ripoll	Divergent understandings of agroecology in the era of the African Green Revolution	2020	10.1177/0030727020930353	Agroecology, African Green Revolution, Development narratives, Knowledge politics	Perspective	Africa, Senegal	Literature and media review, interviewsLiterature review, media analysis, interviews, knowledge politics approach, content analysis	Different understandings of agroecology influence agricultural development narratives, revealing tensions between agroecology and the African Green Revolution in Africa. Agroecology programs in Senegal often reinforce unequal power dynamics and fail to empower smallholders, serving more as a tool for external development actors. the article reveal that agroecology is interpreted and applied in va…	agroecology, knowledge politics, development narratives, sustainability, and African Green Revolution.	Foster greater dialogue between proponents of the African Green Revolution and agroecology to resolve tensions and ensure cohesive agricultural development. Develop agroecology programs with greater attention to local empowerment and avoid reinforcing external dependency on development agencies. promoting a nuanced and inclusive dialogue around the different understandings of agroecology to foste…	Blasio		completed by sylvia
Rachel Bezner Kerr, Jeffrey Liebert, Moses Kansanga, Daniel Kpienbaareh	Human and social values in agroecology: A review	2022	10.1525/elementa.2021.00090	Agroecology, Social equity, Gender equity, Livelihoods, Well-being	Review	Global	Literature review	Agroecology supports equity and well-being by enhancing food security and livelihoods, though there are gaps in research on gender equity and meaningful work.Noted empirical evidence of social well-being improvements for households transitioning to agroecological practices, which were linked to increased financial autonomy and enhanced social ties through knowledge sharing. There was considerable…	Eexploration of human and social values in agroecology, livelihoods, gender dynamics, and the implications of agroecological practices for health.	More research is needed on the gendered implications of agroecology and its potential to provide meaningful, dignified work for marginalized groups.The paper recommends to Conduct systematic reviews to ensure comprehensive identification of relevant literature, addressing the limitations of the current review. Expand the inclusion criteria to encompass a broader range of literature that discusses…	Sylvia
Sébastien Boillat, Patrick Bottazzi	Agroecology as a pathway to resilience justice: Peasant movements and collective action in Senegal	2020	10.1080/13504509.2020.1758972	Agroecology, Resilience justice, Social-ecological systems, Collective action, Senegal	Research Article	Senegal	Knowledge co-production, participatory research	Agroecology enhances resilience justice by addressing power dynamics and reinforcing feedback loops in Senegal's smallholder farming systems, though actions must be more politically engaged.The findings of the research paper indicate that focus group discussion (FGD) participants identified significant social-ecological processes affecting smallholder farmers, particularly highlighting issues suc…		Increase the political engagement of agroecology initiatives in Senegal to ensure broader resilience justice, focusing on power relations in farming communities.The study recommends "Agroecology as a pathway to resilience justice: peasant movements and collective action in the Niayes coastal region of Senegal" by Sébastien Boillat and Patrick Bottazzi are not explicitly stated in the provided con…	Sylvia
Patrick Bottazzi, Sébastien Boillat, Franziska Marfurt, Sokhna Mbossé Seck	Channels of Labour Control in Organic Farming: Toward a Just Agroecological Transition for Sub-Saharan Africa	2020	10.3390/land9060205	Agroecology, Labour control, Organic farming, Social justice, Senegal	Research Article	Senegal	Case study analysis, interviews, Bourdieu’s theory of social fields	Despite claims of better working conditions in agroecology, top-down labour control persists in Senegal, limiting farmworkers' autonomy. The key findings of the study indicate that agroecological initiatives in Senegal, while aimed at improving agricultural practices and sustainability, often do not empower farm workers and may limit their autonomy. The study highlighted that labor control within…	workers control and labour autonomy in agroecology	Empower farmers through bottom-up governance and enhance their participation in agroecological decision-making to improve labour conditions. The main recommendations from the study include the need for clear government support to ensure equitable access to land and water, protection of preferential market space for organic products, and the provision of nation-wide technical and logistical suppor…	Charles
François Xavier Côte, Bruno Rapidel, Jean Michel Sourisseau, Francois Affholder, Nadine Andrieu	Levers for the agroecological transition of tropical agriculture	2022	10.1007/s13593-022-00799-z	Agroecology, Tropical agriculture, Sustainability, Biodiversity, Resilience	Review	Global, Tropical regions, Burkina Faso	Case studies, literature review	Agroecological transitions in tropical agriculture rely on a combination of biotechnical, cognitive, and socio-political levers, with a focus on biodiversity and system resilience. The study highlights both the challenges and opportunities in transitioning to agroecological systems in Africa, emphasizing the need to understand agroecology principles within relevant socio-economic contexts. While …	gender considerations, agroecological principles to enhance the sustainability and resilience	Implement agroecological practices that balance technical and social innovations, with emphasis on knowledge sharing and biodiversity management in tropical regions. The paper's main recommendations for developing and implementing agroecology in tropical agriculture emphasize the need to mobilize and manage ecological processes to boost agroecosystem sustainability and resilience. It advocates fo…	Charles
Steve Gliessman	Evaluating the impact of agroecology	2020	10.1080/21683565.2020.1774110	Agroecology, Impact assessment, FAO tool, Sustainable food systems	Editorial	Global two african countries (Angola)	Discussion, evaluation tool	The FAO's multidimensional assessment tool for agroecological transitions helps measure the impact of agroecology on food systems and supports broader adoption of sustainable practices.The paper discusses the development of the Tool for Agroecology Performance Evaluation (TAPE) by the FAO, which aims to provide a multidimensional assessment framework for agroecological transitions. This tool is b…	Agroecology impacts sustainable food systems.	Use the FAO's assessment tool to evaluate the sustainability of agroecological practices and promote their global adoption to address food system challenges.The research paper recommends familiarizing oneself with the Tool for Agroecology Performance Evaluation (TAPE) and applying it in various contexts, locations, and food systems. It emphasizes the importance of using this participatory, transd…	Sylvia
Fabio Leippert, Maryline Darmaun, Martial Bernoux, Molefi Mpheshea	The potential of agroecology to build climate-resilient livelihoods and food systems	2020	10.4060/cb0438en	Agroecology, Climate resilience, Livelihoods, Food systems, Policy	Report	Kenya, Senegal	Meta-analysis, case studies	The key findings of the study indicate that agroecological practices generally lead to better performance compared to conventional practices, particularly in terms of resilience indicators. Significant differences were observed in four out of thirteen resilience indicators, with agroecological systems scoring higher in three of these indicators related to social organization and ecological divers…	Discusses the results of meta-analyses, submissions from parties and observers on agroecological practices,	Overcome barriers to agroecology by integrating it into climate policies and promoting cross-sectoral collaboration to improve resilience in farming communities.Embrace complexity and adopt a systemic understanding of challenges and solutions to address the lack of awareness, communication, and knowledge on agroecology.Consolidate current multi-stakeholder dynamics and strengthen the DyTAES frame…	Sylvia
Allison Loconto, Eve Fouilleux	Defining agroecology: Exploring the circulation of knowledge in FAO’s Global Dialogue	2019	N/A	Agroecology, Knowledge co-production, FAO, Institutionalization	Research Article	Global , Africa	Ethnography, participant observations, interviews	The key findings of the study include the classification of participants in international agroecology events into various actor categories, such as producer organizations, private sector, UN or intergovernmental organizations, civil society, government, and scientific entities. The study highlighted the significant presence and influence of civil society organizations, particularly La Via Campesi…		Enhance the inclusion of civil society actors in decision-making processes to ensure that agroecology is institutionalized in a socially just and equitable manner.The paper discusses the recommendations derived from a series of discussions and events related to agroecology and sustainable development. While specific recommendations are not detailed in the provided context, it mentions that the re…	Sylvia
Franziska Marfurt, Tobias Haller, Patrick Bottazzi	Green Agendas and White Markets: The Coloniality of Agroecology in Senegal	2023	10.3390/land12071324	Agroecology, Coloniality, Alternative food networks, Climate change, Migration	Research Article	Senegal	Fieldwork, co-produced knowledge, participatory observation. .	The complexities and challenges associated with agroecological transitions in Senegal, particularly in relation to Participatory Guarantee Systems (PGS). The study emphasizes the importance of co-produced knowledge, which is contextually situated and reflects the positionalities of the researchers and participants. It identifies the need for a nuanced understanding of local realities, including t…		The research paper recommends exploring locally feasible ways of more sustainable farming practices that acknowledge local realities and market and labor relations, including migrant labor. It emphasizes the importance of adopting a strictly participatory and transdisciplinary approach to better understand the complexities of local communities and their potential for empowerment or disempowerment…	Sylvia
Georgina McAllister, Julia Wright	Agroecology as a Practice-Based Tool for Peacebuilding in Fragile Environments: Three Stories from Rural Zimbabwe	2019	10.3390/su11030790	Agroecology, Peacebuilding, Social capital, Zimbabwe	Research Article	Zimbabwe	Participatory action research, case studies	Agroecology fosters autonomy and collective action among smallholders in Zimbabwe, helping to build peace through re-forged social-ecological relationships. The key findings of the study highlighted the differences in resilience, agency, and peace among agroecological farmers compared to conventional farmers. Agroecological farmers demonstrated higher levels of productive diversity, seed saving, …	Focusing on the social-ecological relationships, community participation,	Utilize agroecology in post-conflict regions to strengthen social bonds and collective community resilience through inclusive farming practices. Encourage the adoption of agroecological practices among farmers to enhance resilience and sustainability in agricultural systems.Promote participatory action research approaches that involve local communities in the co-creation of knowledge and practice…	Sylvia
Elisa Oteros-Rozas, Federica Ravera, Marina García-Llorente	How Does Agroecology Contribute to the Transitions towards Social-Ecological Sustainability?	2019	10.3390/su11164372	Agroecology, Social-ecological systems, Gender, Food sovereignty, Social learning	Editorial	Global, Zimbabwe	Systematic review, literature overview	Agroecology has potential for social-ecological sustainability through enhanced ecosystem services, social learning, and gender-sensitive approaches, but needs further institutional support.The research paper highlights several important aspects of agroecology and its role in supporting social-ecological sustainability. Firstly, there is a geographical diversity in the contributions, with studies…	Agroecological practices that enhance ecosystem services.The potential of agroecology to promote social learning and innovation.Gender and feminist perspectives in agroecology. The political articulation of agroecology and public policies.The institutionalization of agroecology	Expand public policies that support agroecology, particularly through gender-sensitive approaches and fostering ecosystem services for sustainability transitions. The paper recommends assess the impacts of farming practices not only on ecosystem functioning but also on the social, economic, and cognitive dimensions of agri-food systems as social-ecological systems. Identify and address gaps in kn…	Sylvia	sylvia
Michael Rudolph, Evans Muchesa, Florian Kroll	Towards an Eco-social Food System: The Shift from Industrial Agriculture to Agroecology in South Africa	2020	10.11648/j.ijsdr.20200602.11	Agroecology, Food security, Urban agriculture, South Africa	Research Article	South Africa	Literature review, evaluation of food resilience programs	Agroecology is essential for addressing food security in urban and peri-urban areas in South Africa, particularly for vulnerable households, but faces challenges from urban land use policies.The key findings of the research paper highlight the potential of low input small-scale agriculture, particularly agro-ecology, in addressing food insecurity in urban and peri-urban areas. The study emphasize…		Reform urban land use policies to promote urban agroecology, and support vulnerable households with training and resources to enhance food security through local farming practices.The recommendations for this research study include the need for more programmatic solutions and approaches to address food insecurity in both urban and rural areas. It suggests the implementation of a participatory ext…	Sylvia	sylvia
Erwan Sachet, Ole Mertz, Jean-François Le Coq, Gisella S. Cruz-Garcia, Wendy Francesconi, Muriel Bonin, Marcela Quintero	Agroecological Transitions: A Systematic Review of Research Approaches and Prospects for Participatory Action Methods	2021	10.3389/fsufs.2021.709401	Agroecology, Participatory action research, Systematic review, Transformation, Epistemology	Systematic Review	Global Tanzania ( one country)	Systematic review of 347 studies, participatory action research	Participatory research is essential for agroecological transitions, yet few studies fully employ transformative participatory methods, limiting long-term agroecological change.Research findings indicate that agroecology is primarily understood in two ways: as agro-ecological zoning (AEZ) and as a set of practices. Specifically, 60% of the selected case studies referred to agroecology as AEZ, with…	importance of using case studies to represent agroecological implementation research	Increase the use of participatory action research in agroecology projects to ensure long-term sustainability and deeper involvement of farming communities in decision-making.The recommendations for the study emphasize the importance of engaging with farmers and communities to better understand their perceptions, priorities, and knowledge. This participatory approach can enrich the analytical posi…	Sylvia	sylvia
Fergus Sinclair, Alexander Wezel, Cheikh Mbow, Susan Chomba, Valentina Robiglio, Rhett Harrison	The Contribution of Agroecological Approaches to Realizing Climate-Resilient Agriculture	2019	N/A	Agroecology, Climate resilience, Ecosystem services, Food security	Background Paper	Africa	Literature review, case studies, synthesis of agroecological principles	Agroecology can enhance climate resilience and food security, particularly in the Sahel, through sustainable practices such as natural regeneration and adaptive farming techniques. The article highlights that agroecological practices significantly enhance climate resilience across multiple scales, including field, farm, landscape, and food systems. Key findings reveal that integrating practices l…	Agroecology, climate resilience, biodiversity, livelihoods, policy.	Support the scaling of agroecological practices through policy reform, market incentives, and increased research on cost-effectiveness and climate resilience benefits. The article recommends prioritizing policies that support the widespread adoption of agroecological practices by addressing market failures and removing perverse incentives, such as subsidies for artificial fertilizers and pesticid…	Blasio	sylvia
Pablo Tittonell, Veronica El Mujtar, Georges Felix, Yodit Kebede, Luciana Laborda, Raquel Luján Soto, Joris de Vente	Regenerative Agriculture—Agroecology without Politics?	2022	10.3389/fsufs.2022.844261	Agroecology, Regenerative agriculture, Sustainability, Social movements	Opinion Article	Global 4 african countries (Kenya, Ethiopia, Zimbabwe + the Sahel)	Comparative analysis, literature review	Agroecology and regenerative agriculture share many practices, but agroecology places greater emphasis on social justice and political dimensions of sustainability, which regenerative agriculture may overlook.The key findings of the paper indicate that there are significant structural differences in the textual information related to agroecology and regenerative agriculture, as revealed through c…		Foster greater integration between agroecological principles and regenerative agriculture to ensure both environmental and social justice goals are achieved in sustainable farming transitions.The recommendations from the paper suggest that regenerative agriculture (RA) should incorporate a broader understanding of social dimensions alongside technical practices. This includes recognizing the impo…	Sylvia
Akakpo K.; Bouarfa S.; Benoît M.; Leauthaud C.	Challenging agroecology through the characterization of farming practices’ diversity in Mediterranean irrigated areas	2021			a research article.	Africa		The key findings of the study indicate that the technical management routes (TMRs) for chilli-pepper crops in the Merguelil irrigated plain are highly diversified and contrasted. The research highlights the existence of environmentally-friendly TMRs within a conventional agricultural framework, although farmers face common challenges related to fertilization management and pesticide use. The stud…	The challenges of integrating agroecological approaches within conventional agriculture.	The recommendation in this paper is to reassess the paradigm that associates irrigated agriculture with intensification and pollution. The findings suggest that smallholder farming in irrigated areas can lead to the emergence of more environmentally friendly or agroecological farming practices. It highlights the existence of a wide range of agroecology-compatible practices at the plot level, whic…	sylvia
Mazibuko D.M.; Gono H.; Maskey S.; Okazawa H.; Fiwa L.; Kikuno H.; Sato T.	The Sustainable Niche for Vegetable Production within the Contentious Sustainable Agriculture Discourse: Barriers, Opportunities and Future Approaches	2023		sustainable agriculture, agroecology, vegetable production, barriers, opportunities, adoption, southern Africa, conservation agriculture.	a research article.	Africa		The key findings of the study highlight the importance of community involvement in the adoption of sustainable agricultural practices. It emphasizes that technologies offered to farmers must address locally identified challenges to enhance adoption rates. The study suggests a need for national mapping of agroecological technologies, considering factors such as local agricultural challenges, geo-c…		The recommendation of the paper is to emphasize the importance of community participation and field trials in the dissemination and promotion of sustainable agricultural practices. It suggests that technologies should be introduced in response to clearly identified challenges faced by local communities, ensuring that farmers are actively involved in the process. This approach is expected to reduc…	sylvia
Rakotovao N.H.; Chevallier T.; Chapuis-Lardy L.; Deffontaines S.; Mathé S.; Ramarofidy M.A.; Rakotoniamonjy T.H.; Lepage A.; Masso C.; Albrecht A.; Razafimbelo T.M.	Impacts on greenhouse gas balance and rural economy after agroecology development in Itasy Madagascar	2021			a research article.	Africa		The key findings of the research paper indicate that the adoption of agroecological practices (AP) has significant potential to improve greenhouse gas (GHG) balance and enhance farmers' income. The study emphasizes that large-scale adoption of AP is essential for meaningful climate change mitigation, while also contributing to sustainable development goals such as food security and farmer well-be…	Adoption of agroecological practices (AP) as a promising approach for mitigating climate change while enhancing food security and farmer well-being.	The research paper recommends the adoption of agroecological practices, particularly agroforestry, as a promising approach to achieve environmental sustainability and improve agricultural productivity. It emphasizes the importance of these practices in enhancing carbon sequestration, reducing agricultural risks, and addressing climate change impacts, particularly for smallholder farmers. The stud…	sylvia
Nikiema, Théodore; Ezin, Eugène C.; Chogou, Sylvain Kpenavoun	Bibliometric Analysis of the State of Research on Agroecology Adoption and Methods Used for Its Assessment	2023						The key findings of the research paper highlight the importance of themes related to agroecology adoption, climate change, and the development of farmers' knowledge as central issues in the field. The study utilized clustering algorithms to identify five primary thematic classes: global agriculture, agroecology adoption, climate change, management of agricultural landscapes, and farmers' knowledg…		The research paper recommends that further studies should focus on developing robust and comparable methods for modeling agroecological transitions across different geographical areas. It highlights a gap in the literature regarding the identification of determinants and strategies for agroecological adoption, particularly the limited use of machine learning and econometric methods in this contex…	sylvia
Sebastien Boillet,Raphael Belmin, Patrick Botazzi	The agroecological transition in Senegal: transnational links and uneven empowerment	2021	10.1007/s10460-021-10247-5	Agroecological transition, pollitical agroecology	Online Article	Segenal	Interviewws,participatory involving the actors in promotion of agroecology in the country	There was launch of innitiatives that focused on enviromental issues in agriculture in 1980s by ENDA-FRONAT, anational NGO formed by a group of French and African intellectuals to promote agroecology practices. The liberal policy strengthened the roll of NGOs and foreign coperation agencies who filled the void created by disangements of the state agricultural development. After the year 2000, the…	Agroecological niche networks, transional ties and capital flows, farmer union, research organization, International coperation, and platform.	Increase efficiency in communication,entrepreneurship, commercialization,production support,irrigation development,firewood use improvement,soil science and participatory methods.Also subsitute alternative pracices such as certification, tranformation support, input substitution, renewable energy and animal welfare. Also to redesign agroecology systems- climate change adaptation, agroforestry ass…	Tadeo	Completed by SYLVIA
Aboubakar Iyabano, Laurens Klerkx, Guy Faure, AurÃ©lie Toillier	Farmers' Organizations as innovation intermediaries for agroecological innovations in Burkina Faso	2022	10.1080/14735903.2021.2002089	ecological principles, organic agriculture, agricultural innovation systems, innovation brokers, food systems transformation		Burkina Faso	Three FO case studies using qualitative interviews and innovation systems lens.	FOs act as intermediaries for knowledge and innovation diffusion in agroecology; support long-term and collective innovation processes.	Farmer Organizations influence on farmer decisions	Strengthen FO capacity for knowledge brokering, advocacy, and long-term agroecological transition support.
B. Jan Middendorf, P.V. Vara Prasad, Gary M. Pierzynski	Setting research priorities for tackling climate change	2019	10.1093/jxb/erz360	climate change, empowerment, facilitation, multidisciplinary, participatory approaches, stakeholder engagement		Rwanda, Bangladesh, Tanzania, Cambodia, sub-Saharan Africa	Participatory, multi-stakeholder processes in three case studies (Bangladesh, Tanzania, Cambodia, Rwanda, SSA).	Participatory methods enabled local ownership of climate-smart, sustainable intensification priorities; highlighted cross-domain needs.		Embed participatory learning in research design; apply holistic assessment frameworks like the Sustainable Intensification Assessment Framework (SIAF).
Karl S. Zimmerer, Yildiz Aumeeruddy-Thomas, Sophie Caillon, Yolanda JimÃ©nez-Olivencia, Laura Porcel-RodrÃ­guez, Chris S. Duvall	Agrobiodiversity threats amid expanding woody monocultures and hopes nourished through farmer and food movements in the Mediterranean	2024	10.1525/elementa.2023.00093	Agrobiodiversity, food movements, sustainable food systems, woody monocultures, biodiversity conservation, climate change adaptation		Spain, Morocco, France	Commentary based on literature synthesis and Mediterranean case examples.	Agrobiodiversity threatened by expansion of woody monocultures; farmer/food movements offer vital support via local food systems.	agroecological practices	Policy should bridge production-consumption linkages; agroecology must explicitly include agrobiodiversity in design and monitoring.
Ioanna Mouratiadou et al.	The socio-economic performance of agroecology: A review	2024	10.1007/s13593-024-00945-9	Agroecological practices; socio-economic indicators		Europe, Africa, Latin America, Asia	Rapid review of >13,000 articles using structured screening and socio-economic indicators framework.	51% of outcomes positive; strongest in financial capital (e.g. income, productivity); mixed in human capital (e.g. labor intensity).	economics viability
Sarah K. Jones et al.	Research strategies to catalyze agroecological transitions in low- and middle-income countries	2022	10.1007/s11625-022-01163-6	Agroecology, Sustainable food systems, Food system transformation, Transition pathways		Burkina Faso, Vietnam, Cuba, Brazil	Four case studies (Burkina Faso, Vietnam, Cuba, Brazil) analyzed using participatory action research and systems thinking.	Agroecological transitions are enabled by local socio-technical support, policy/market environments, and participatory research.	research, knowledge, markets,	Prioritize research to support agroecological transitions by leveraging local innovation networks, participatory governance, and market support.
